# Supplementary material for: SUMO peptidase ULP-4 regulates mitochondrial UPR-mediated innate immunity and lifespan extension
Source: eLife journal article supplement (doi:10.7554/elife.41792), 2019-01-14
Supplement: supp [file elife_poa_e41792_Figure_1_figure_supplement_2.pdf › elife_poa_e41792_Figure_1_figure_supplement_2.pdf]

ULP-1 MSRRSDL-----SDKDSQSRKRHWLTDQ-AVTNEEKEQSPTKR---TRKTK--  
ULP-2 MSDSTQMEANAAINEIKKRTRKLDQSLQMRFCADQFFIGNHCTKLASGKSIIISQNSKNR  
ULP-4 MEVSTSY-----  
ULP-5 MPH-----  
\*  
ULP-1 -----SQGLGGLFNTFFGM-----FVSSNSGEKEKTEV-----SGEVQVQE  
ULP-2 ICLRFFMAADPLVGYTGDRDFGIAFNQIDHISLKDEQQENPAVLICTLNLSSYTKMCKLQT  
ULP-4 -----CT-----  
ULP-5 -----  
  
ULP-1 DDEIIVEG---TTRRVAENKKYMI FLNEDAP---VRANAGSEENE-----VIIE  
ULP-2 GLKDVVEKPFLYNKSLARNLTFILKPWNDDPDTFVKISYNDEHREYVHSYDYDVAKSLMF  
ULP-4 -----P--AVNFKYGSFQDS-----  
ULP-5 -----P-----  
\*  
ULP-1 KHVQK--NVEIRNDEEKQEVQGDVLVLTLS SSPKSPKNLEKSFEVQQDDEEPDVLFEKVVK  
ULP-2 KEVQAVWEQSLKEQLQRRHQ TGRVYLTSQLSEMPREWVQ-FLADQK-----LSK--IV  
ULP-4 -----DVSMRED-----D-----LFR--MG  
ULP-5 -----KLTPK-----  
  
ULP-1 TPNKQLQEARRFQNELIFLNDNPDPDDVSVIS---DSRSKEFIS-----PTPDDS  
ULP-2 CHNGSIQYAR-----VEDNPHGRKHTAVATNGFDHRGTRVLNSFGKAHASLATQEKS  
ULP-4 SYNSQGYADG-----THLDGSIGEEDETSSGS-----  
ULP-5 -----  
  
ULP-1 VSRPITPSLSSLSNYTSNNVRDYWRNSAKKPEVLRRV---PVRHQF-----KHS  
ULP-2 YAKKRKLTEQSLKLIYRND-RSVWLEGSCAKNLKMPKINSEPNMGFEFMGWPDMDNAMTHP  
ULP-4 -----ND-----QH-  
ULP-5 -----  
  
ULP-1 TSVRKMNTIIDLKKIKNHLSSRDRL LQGVVASGQYEAKAISGIVEKKPKKMQR-----  
ULP-2 TSNFENEDVMKSTKQPNDFVSFEQ-----LQAPPPVLQRQNGAIYS  
ULP-4 -MDFEEDDFDMESSMTEDLVDEDE-----EEEDEED-----  
ULP-5 -----CEAPPEK-----  
:  
ULP-1 -----TSSTDILARAKNKIAELGGSRSNTPSLLSREPSIIIDSEESTSSSYRQHARS  
ULP-2 TQSVAFTHISGNDGVEDLTEKISHLGEEAYNID-----MANALHAFSDNWHYEIHP  
ULP-4 -----NDEWTNQKRT  
ULP-5 -----  
  
ULP-1 NSSESDSYRKLN--DILSQINSLGIGSAYRGPQRYQNSYQLSKQKEDKLL EEARIREGHR  
ULP-2 NTVHNASFEQLHIGDGNSSIGTIGFNPLEPYP--QSSFPQSNNWQ-----  
ULP-4 DNQNSVAYYA-----  
ULP-5 -----  
  
ULP-1 SQTRGD-RLEDVRKRLELQGI AIR-----PKVEKKKV D-FMALPDAADALVER  
ULP-2 -QAHGDFTFPQVSFPNTQQGSCLPSTPTAALPPTRPVVEKIPPD TQLFTFP PPSGCT---  
ULP-4 -----AMEMLRIRFPFQ **SI AIR**-----  
ULP-5 -----RLAHLEIRFKDRRHIIP-----PLFHN-----  
:  
:  
:  
:  
  
ULP-1 AWSGGNPNEQFVDAFSIQICKKDLATLSGLHWLNDEIINFYL-QLICDRSNGDSKYPKIY  
ULP-2 --TGMDP-----VVL LVKDIKTLD RKEFLNDSVMAFML-NYIAFMLSSE-LMKSVH  
ULP-4 ----- **ISDFCCLQEKDLLNDTMD FYL-NHIVEHVLPDSNGSNVT**  
ULP-5 GWVGRN-----EDRTLNDTII EFYMC DWMRLEV FDEATRASH  
.  
\*\*\*  
::  
\*  
:  
:  
:  
:  
  
ULP-1 AFNTFFYSNIV-----SKGYASVKRW-----TRKVDIFAF--  
ULP-2 MCNTFLFVNLTRLLPPLCF SKRRPIEPEHIKIVKDNCPRVLRW-----TRKFDVLAK--  
ULP-4 **VLPSIFWHNLS-----LRQHAFDSEDEKMM SDEQKMDLKFGDLHDFVADFDLQDF--**  
ULP-5 VFHSFFLPKIK----TC-FKDFKENPPRRELANHYNRFFR-----SKNDAETFLK  
:::  
:::  
.  
:  
.\*  
  
ULP-1 -DIVLVPVHLG--MHWCM AVI-----  
ULP-2 -DYIIIPINED--LHWLVIAVINPSGA-----IVDMSNEEASR-----  
ULP-4 **-DYIVVPVNEW--EHWSLAVI CHP**-----  
ULP-5 KDILLIPVHLDKPKHWFLVIVHNPSGAVRRISDVNILDATNKVKSRRLSRRITGHVNCDE  
.  
.  
.  
.  
.  
  
ULP-1 DMGEKKIEFYDSL YDGN-----TAVLPALRGYLEAESL DKKKTAMNFSGWT----  
ULP-2 AAPKCYIVFFDPLSGLD-----PSKKNHMCHCIKIYLAQLYENTKAPGMKFASKNPTIY  
ULP-4 **FTAQARTVIFDSQLTAD-----LNNLQNMATLIESFMKYSYEKRTGNAMPFPLPC----**  
ULP-5 NAGECRIIIMDSL VHSSKKYREVIDKTHDSTFDHIRLWL--LMSAAATD VDMFCTRF----  
:  
:  
\*.  
.  
:  
::  
\*  
  
ULP-1 -----IQQMTDIPRQQNGSDCGVFSCQFGE-----WASRR TTP--  
ULP-2 DEERVVVTRAENTPIQDNFYDCGLYVLHFIEGLFCYPNRPVNVNDFPNFDWS--KFFPEA  
ULP-4 **----ILPQRM--PQQTNNFDCGIFIAEFARRFLSPPK-----DLDNFDFA--REYP--**  
ULP-5 --RKVVCQKL--PQQKNSVDCGIFMMAFAEYF-----TKYNTA-WQSLPT-  
:  
\*  
\*  
\*  
\*\*\*:  
\*  
.  
:  
:  
\*  
  
ULP-1 -----RFTQK  
ULP-2 NKMCDLMRDKVYNLILQQADKPARSRLAKFERENKCGLSREGALRKARRHS AVNERRTKR  
ULP-4 **-----DFSTAT**  
ULP-5 -----DALADL  
:  
  
ULP-1 NMPYYRK-----RMVYEI-----VSKLLATI-----  
ULP-2 HRDYARHYSLSPPHRNV MNDDPTFMNPRGLAEMPITRLVRRLRIPEDNFP-IAY  
ULP-4 **KRTEMQRVVLSLSTN**RARWRP-----LVELLNGYSTAAPHRAL  
ULP-5 KMDDDIKSL LNSETPRQRLDE-----LFQSLKA-----  
:  
:  
\*  
:  
.\*
