# Supplementary material for: SUMO peptidase ULP-4 regulates mitochondrial UPR-mediated innate immunity and lifespan extension
Source: eLife journal article supplement (doi:10.7554/elife.41792), 2019-01-14

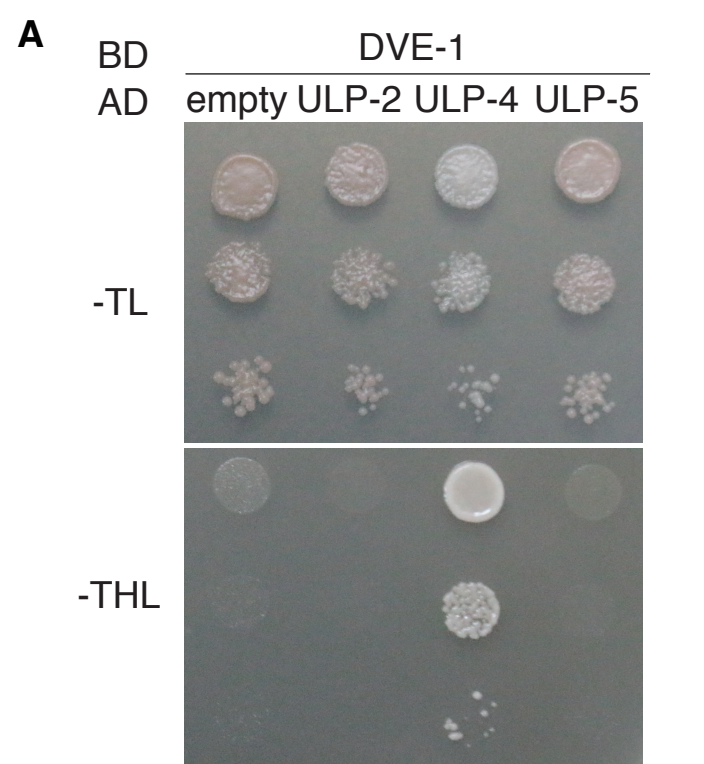

**B**

DVE-1 Yeast-Two-Hybrid Screen Result

| gene            | freq. | gene            | freq. |
|-----------------|-------|-----------------|-------|
| <i>eef-2</i>    | 27    | <i>rps-10</i>   | 3     |
| <i>asp-3</i>    | 20    | <i>rps-28</i>   | 3     |
| <i>rack-1</i>   | 20    | <i>fln-1</i>    | 3     |
| <i>smo-1</i>    | 13    | F37C4.5         | 3     |
| C17F4.7         | 9     | <i>lec-6</i>    | 3     |
| <i>col-122</i>  | 8     | <i>cpr-4</i>    | 3     |
| <i>perm-2</i>   | 8     | <i>rpl-11.1</i> | 2     |
| <i>col-178</i>  | 7     | F37H8.5         | 2     |
| <i>eef-1</i>    | 6     | <i>misp-45</i>  | 2     |
| <i>ubq-2</i>    | 5     | <i>gei-17</i>   | 2     |
| <i>col-144</i>  | 5     | <i>pyc-1</i>    | 2     |
| <i>enol-1</i>   | 5     | <i>snrp-200</i> | 2     |
| <i>col-184</i>  | 4     | K02B12.7        | 2     |
| <i>pcn-1</i>    | 4     | <i>cri-3</i>    | 2     |
| <i>cpl-1</i>    | 4     | Y51F10.7        | 2     |
| C05C10.5        | 4     | <i>dnj-19</i>   | 2     |
| ZK930.2         | 4     | C08B6.8         | 2     |
| <i>rpl-18</i>   | 4     | <i>sodh-1</i>   | 2     |
| <i>pes-9</i>    | 3     | F35H10.6        | 2     |
| <i>misp-79</i>  | 3     | <i>unc-40</i>   | 2     |
| <i>cyp-29A2</i> | 3     | <i>misp-31</i>  | 2     |

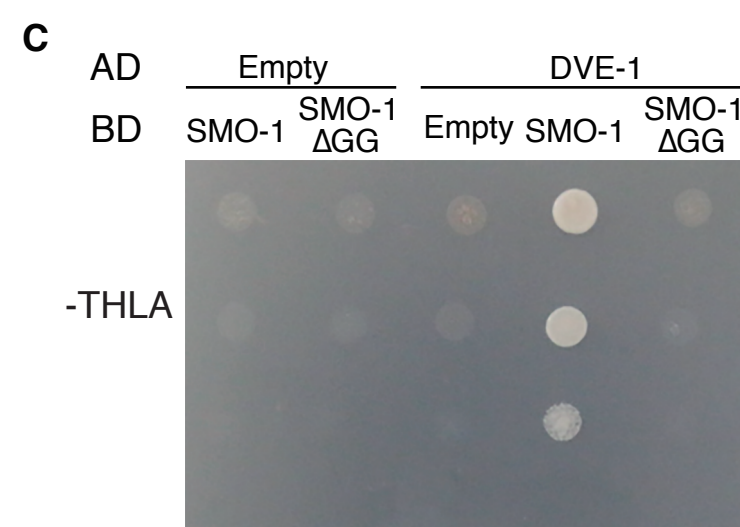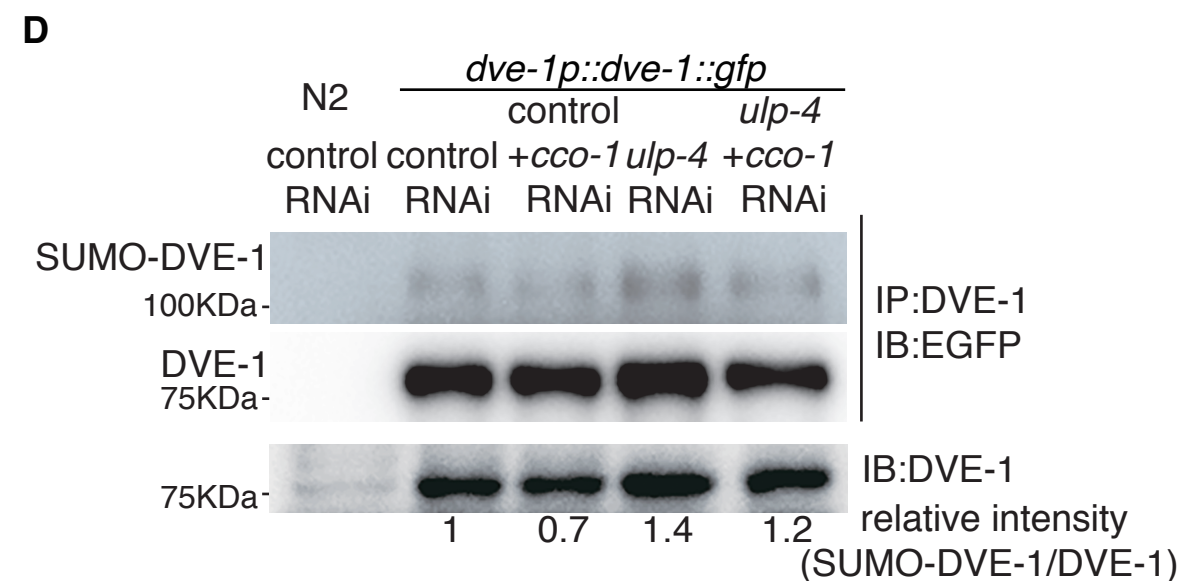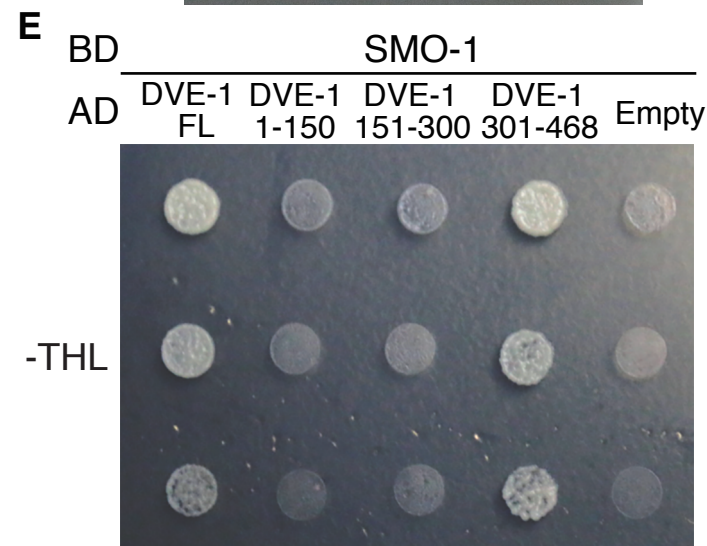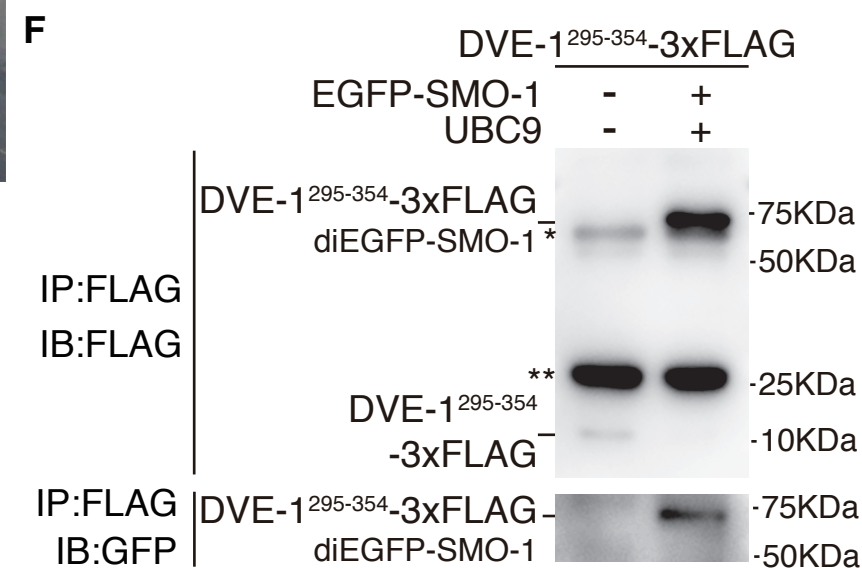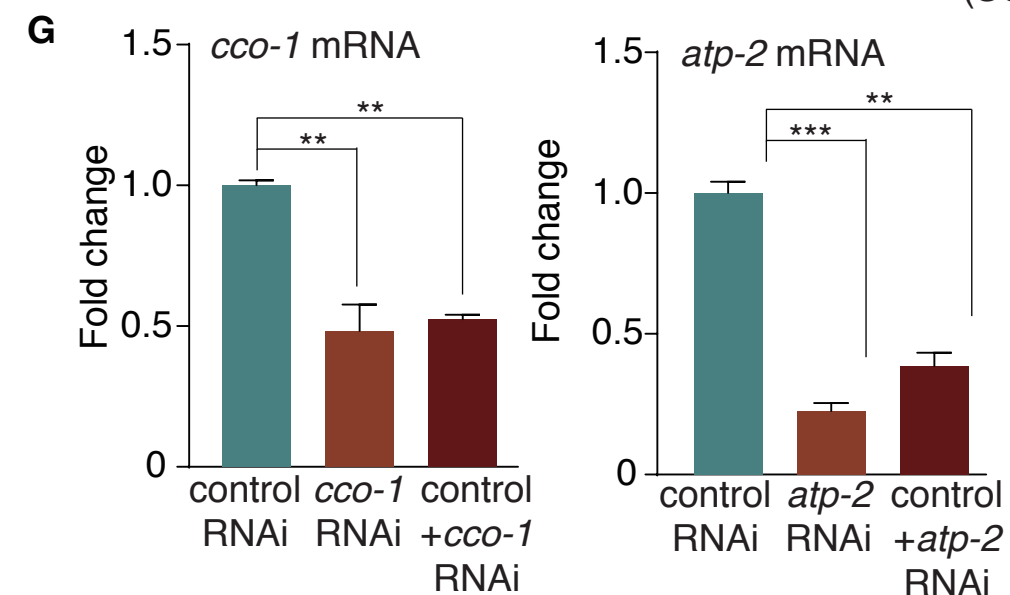

Supplement: supp [file elife_poa_e41792_Figure_2_figure_supplement_1.pdf › elife_poa_e41792_Figure_2_figure_supplement_1.pdf]
