# Supplementary material for: SUMO peptidase ULP-4 regulates mitochondrial UPR-mediated innate immunity and lifespan extension
Source: eLife journal article supplement (doi:10.7554/elife.41792), 2019-01-14

**A**

*hsp-16.2p::*  
*atfs-1::gfp*

*hsp-16.2p::*  
*atfs-1 $\Delta$ 1-32::gfp*

*hsp-16.2p::*  
*atfs-1 $\Delta$ 1-184::gfp*

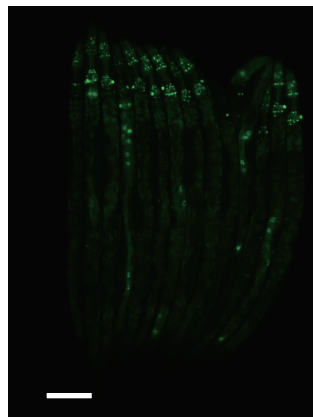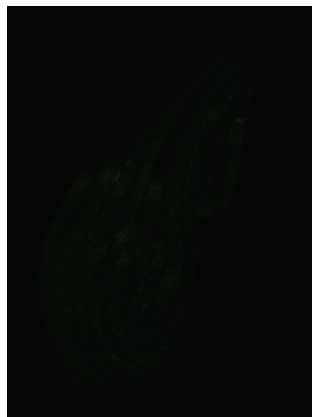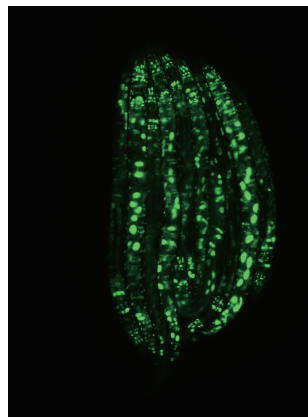**B**

*hsp-16.2p::*  
*atfs-1 $\Delta$ 1-184 K326R::gfp*

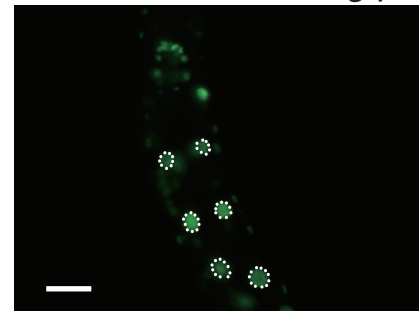**C**

*hsp-16.2p::atfs-1 $\Delta$ 1-184::gfp*

control RNAi

*ulp-4* RNAi

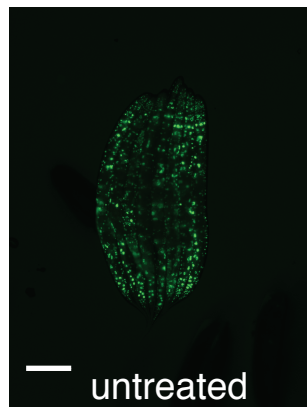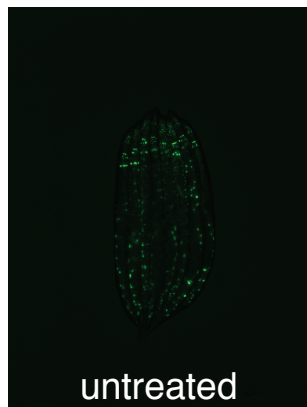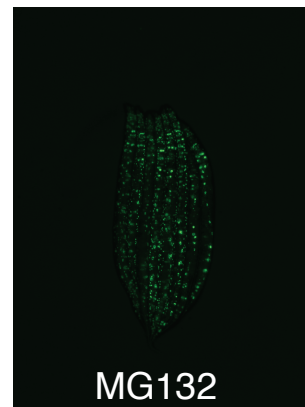**D**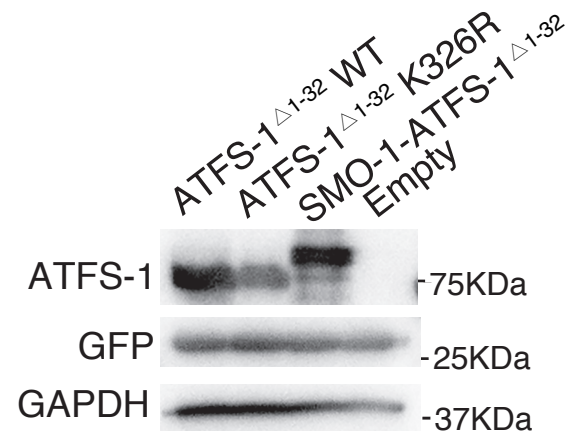

Supplement: supp [file elife_poa_e41792_Figure_5_figure_supplement_1.pdf › elife_poa_e41792_Figure_5_figure_supplement_1.pdf]
