# Supplementary figures and images for: SUMO peptidase ULP-4 regulates mitochondrial UPR-mediated innate immunity and lifespan extension
Source: eLife journal article supplement (doi:10.7554/elife.41792), 2019-01-14

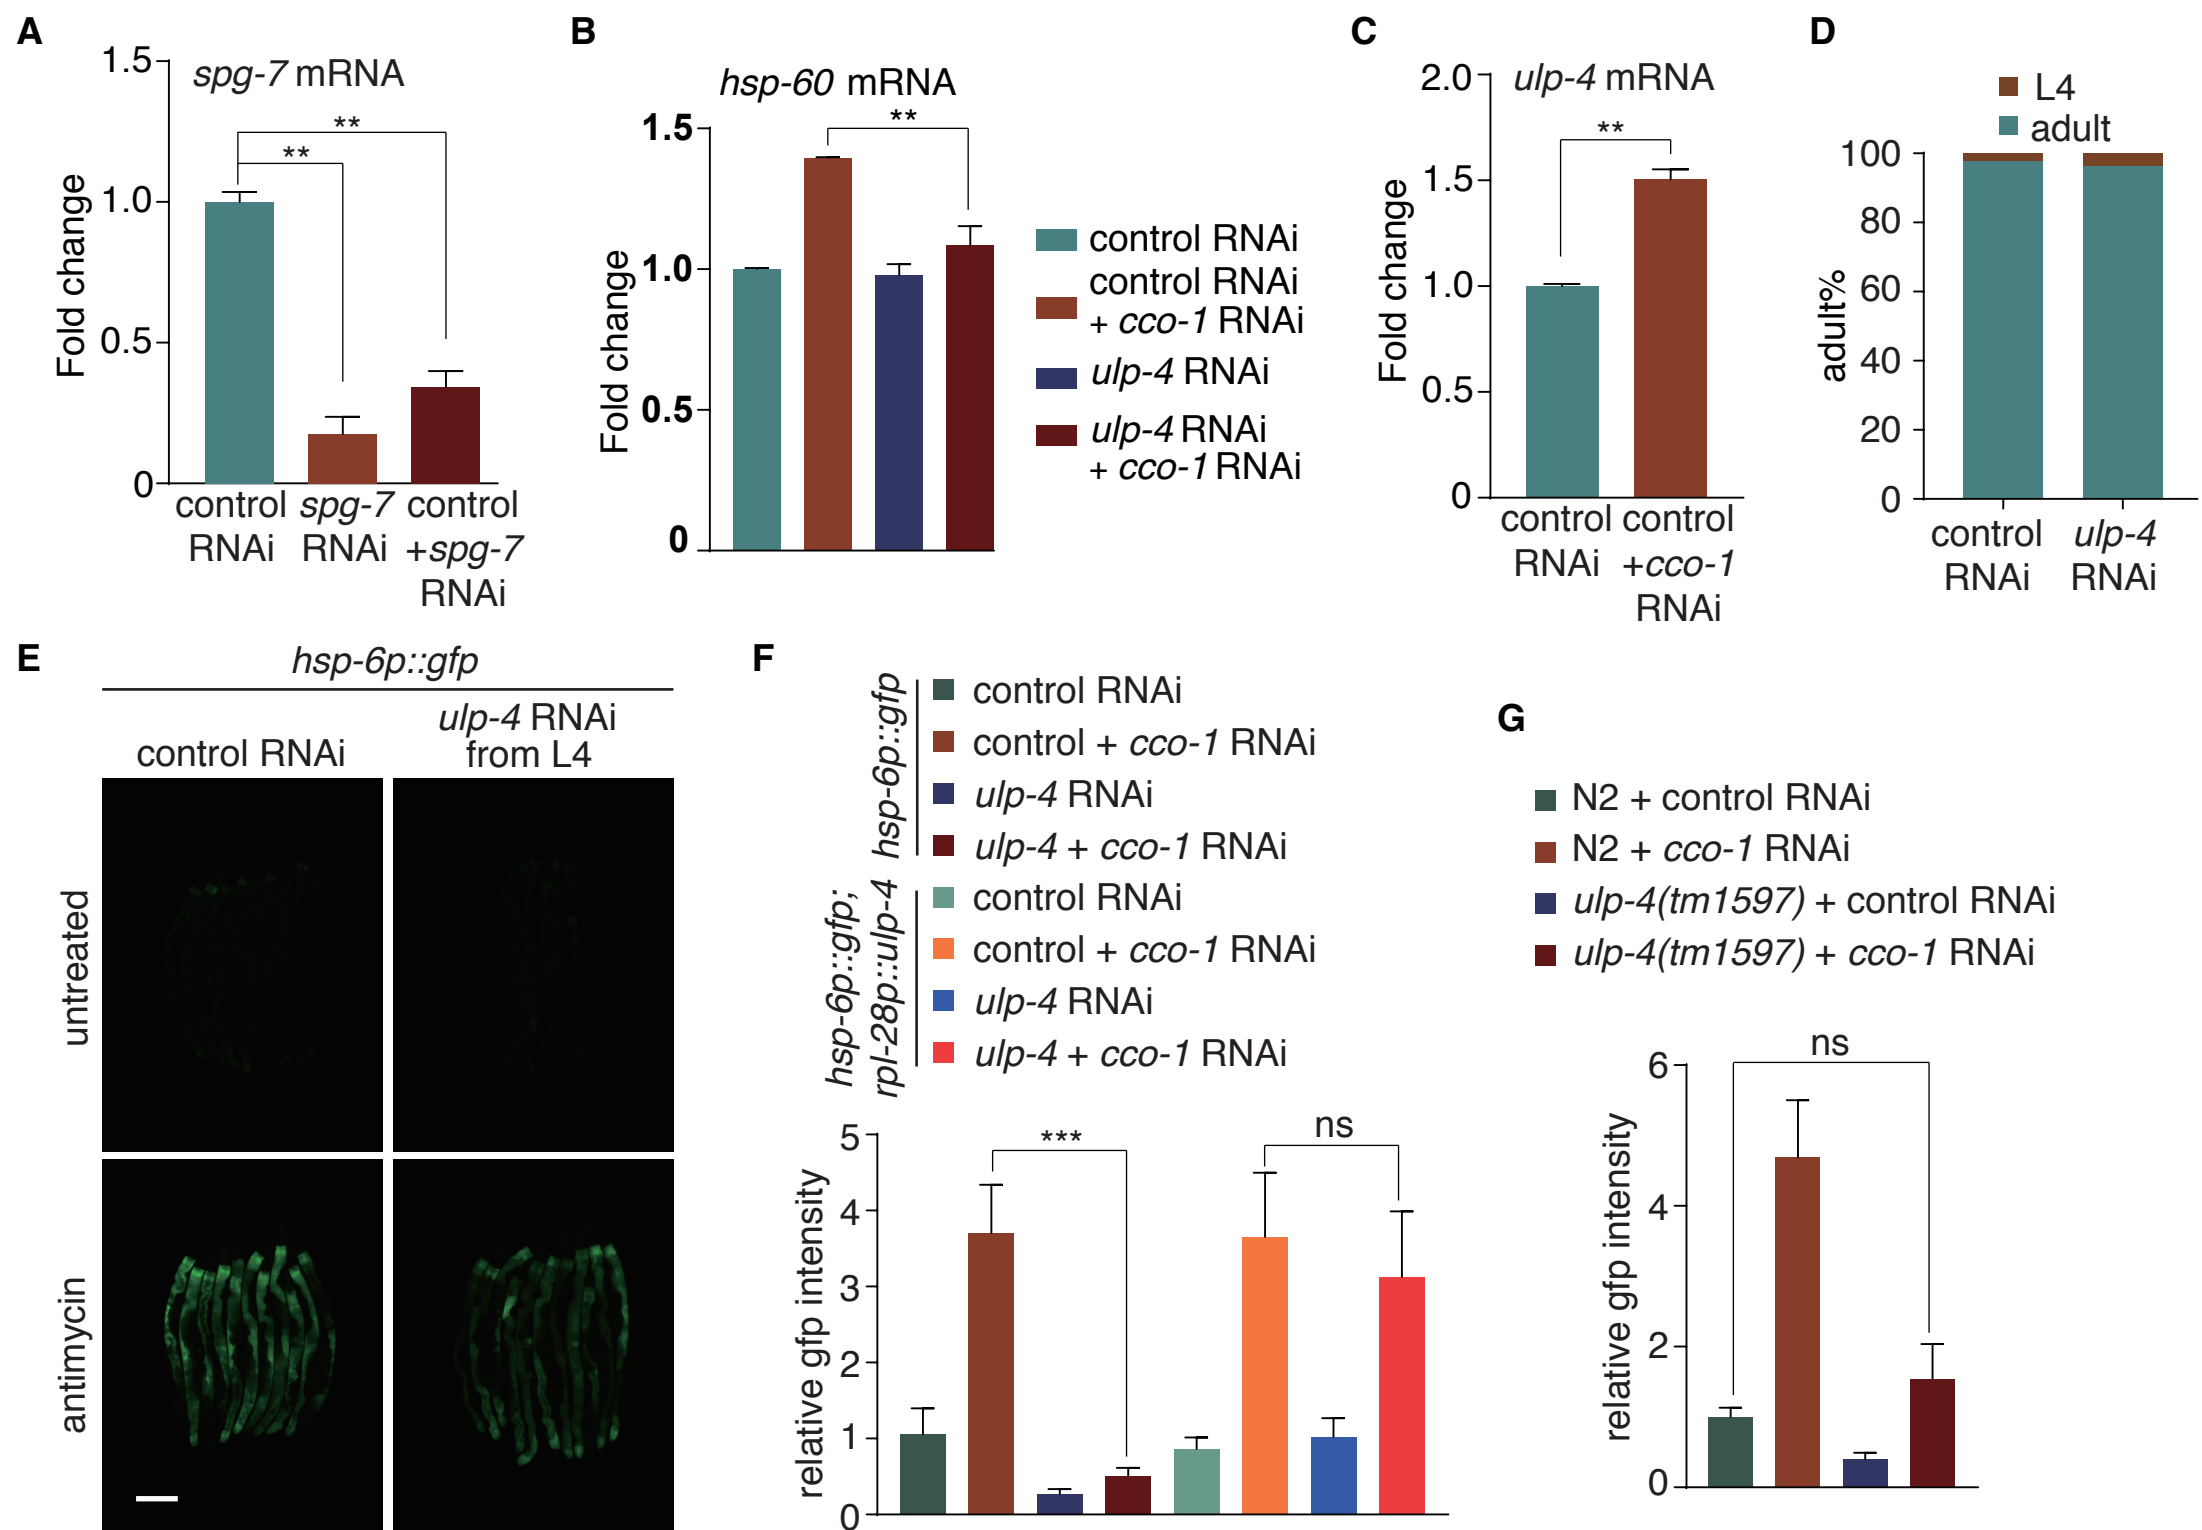

Supplement: supp [file elife_poa_e41792_Figure_1_figure_supplement_1.pdf › elife_poa_e41792_Figure_1_figure_supplement_1.pdf]

**A**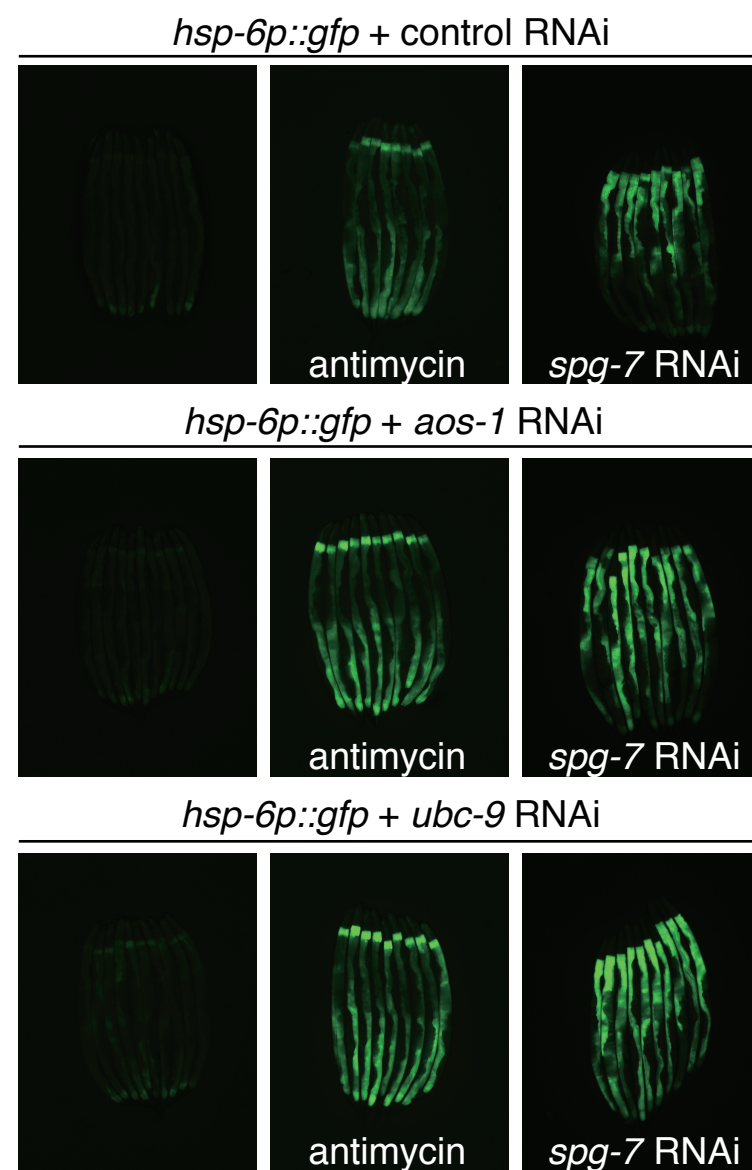**B**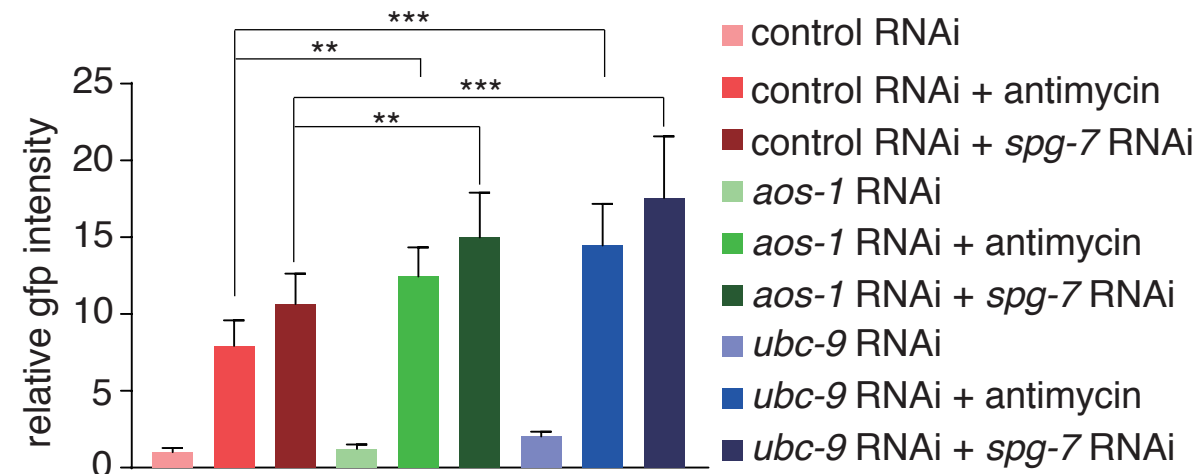**C**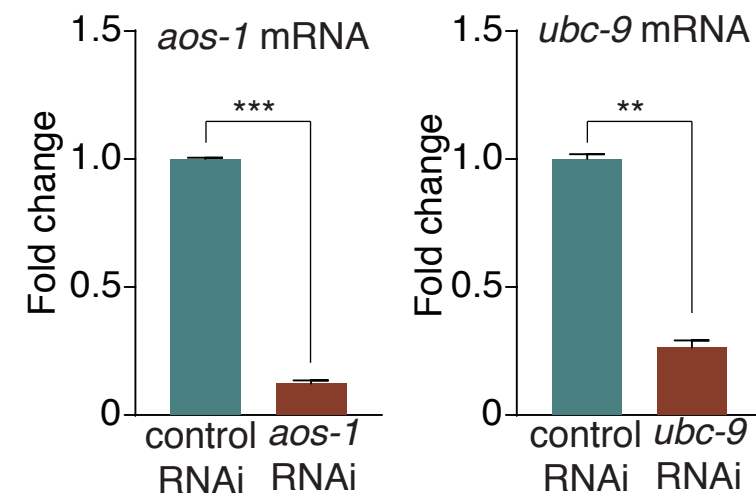**D**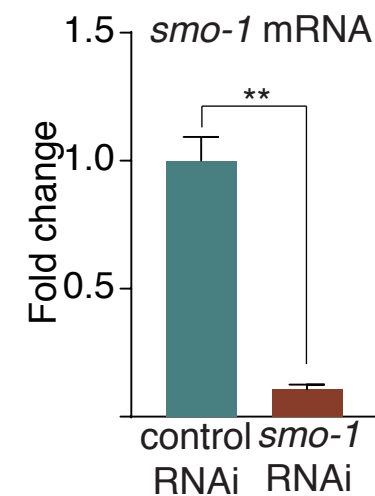**E**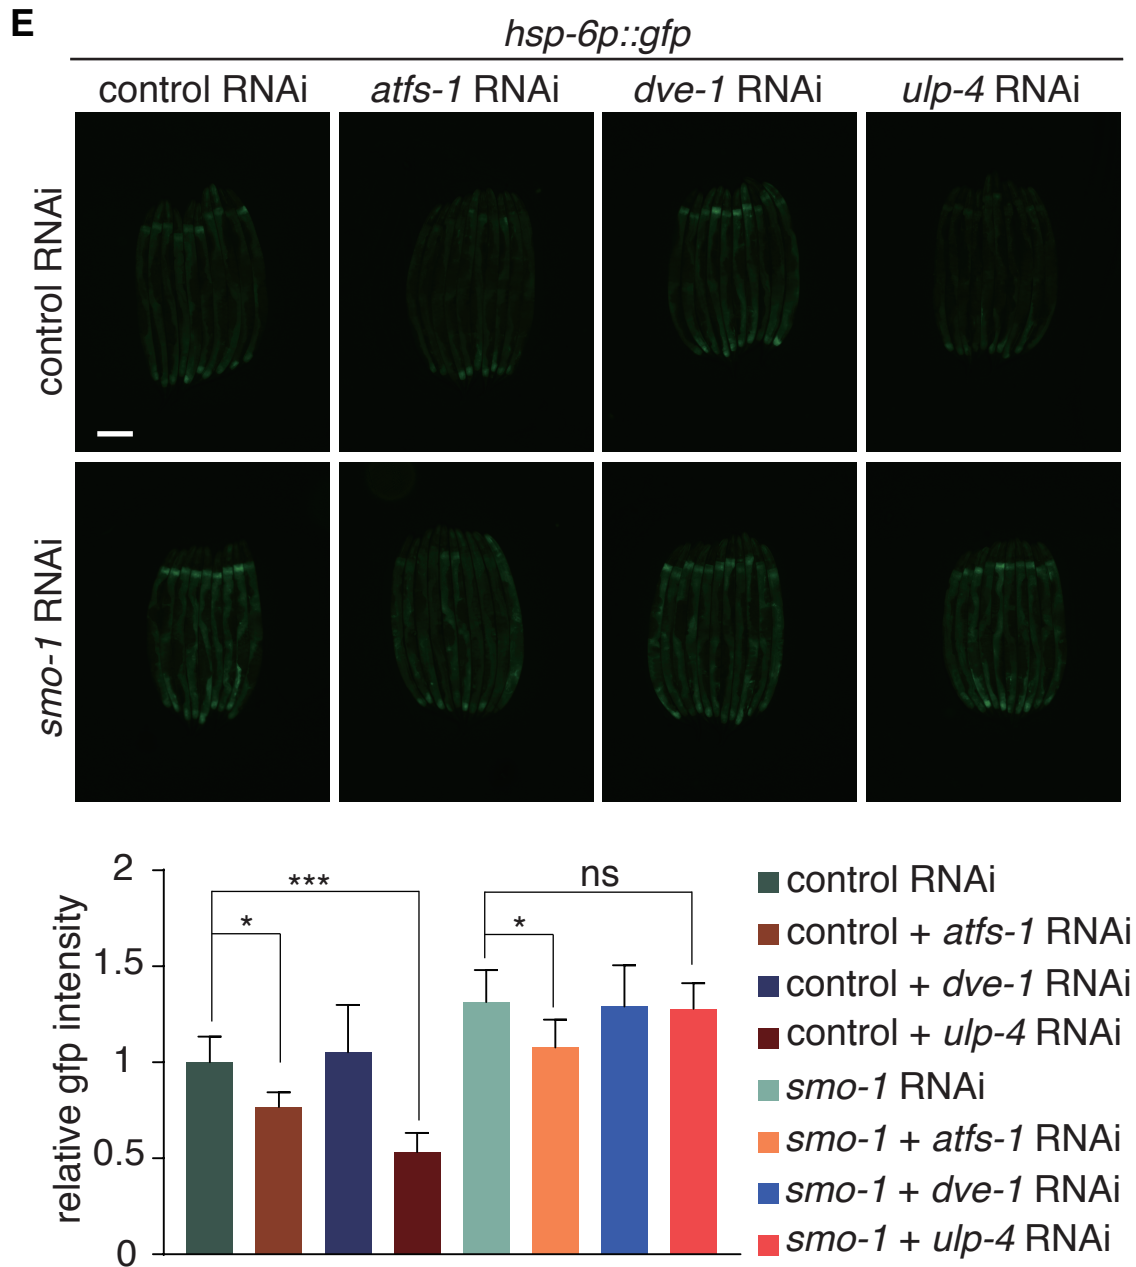**F**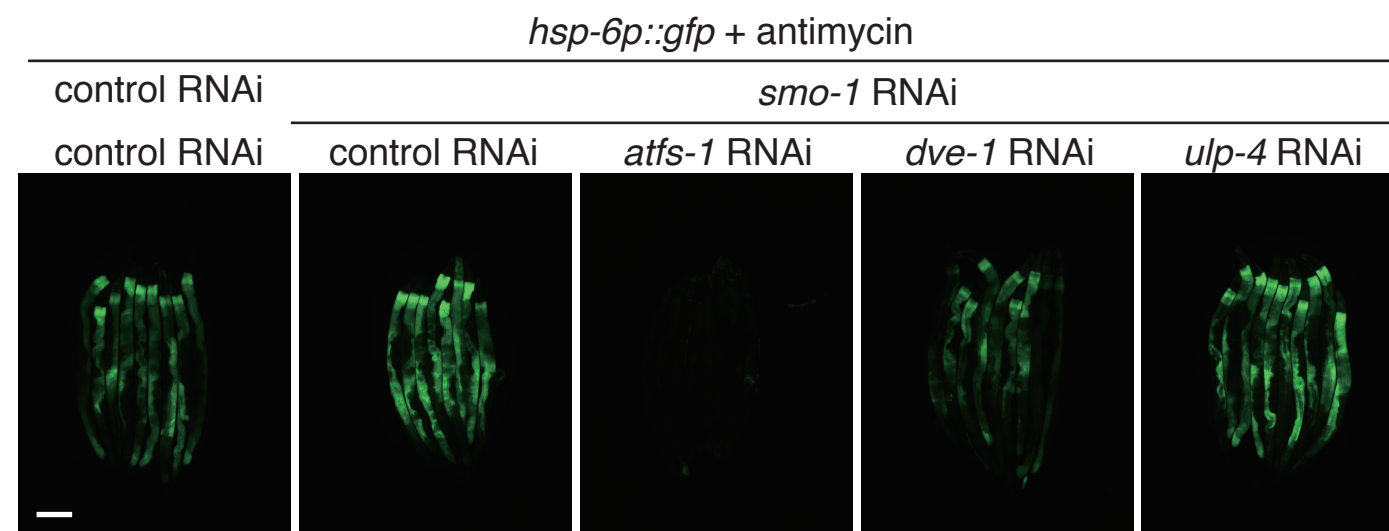**G**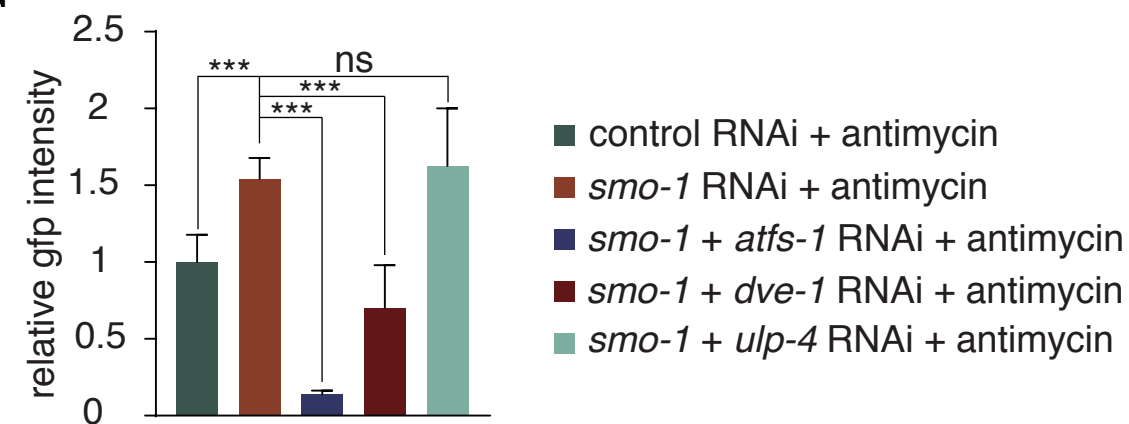

Supplement: supp [file elife_poa_e41792_Figure_1_figure_supplement_3.pdf › elife_poa_e41792_Figure_1_figure_supplement_3.pdf]

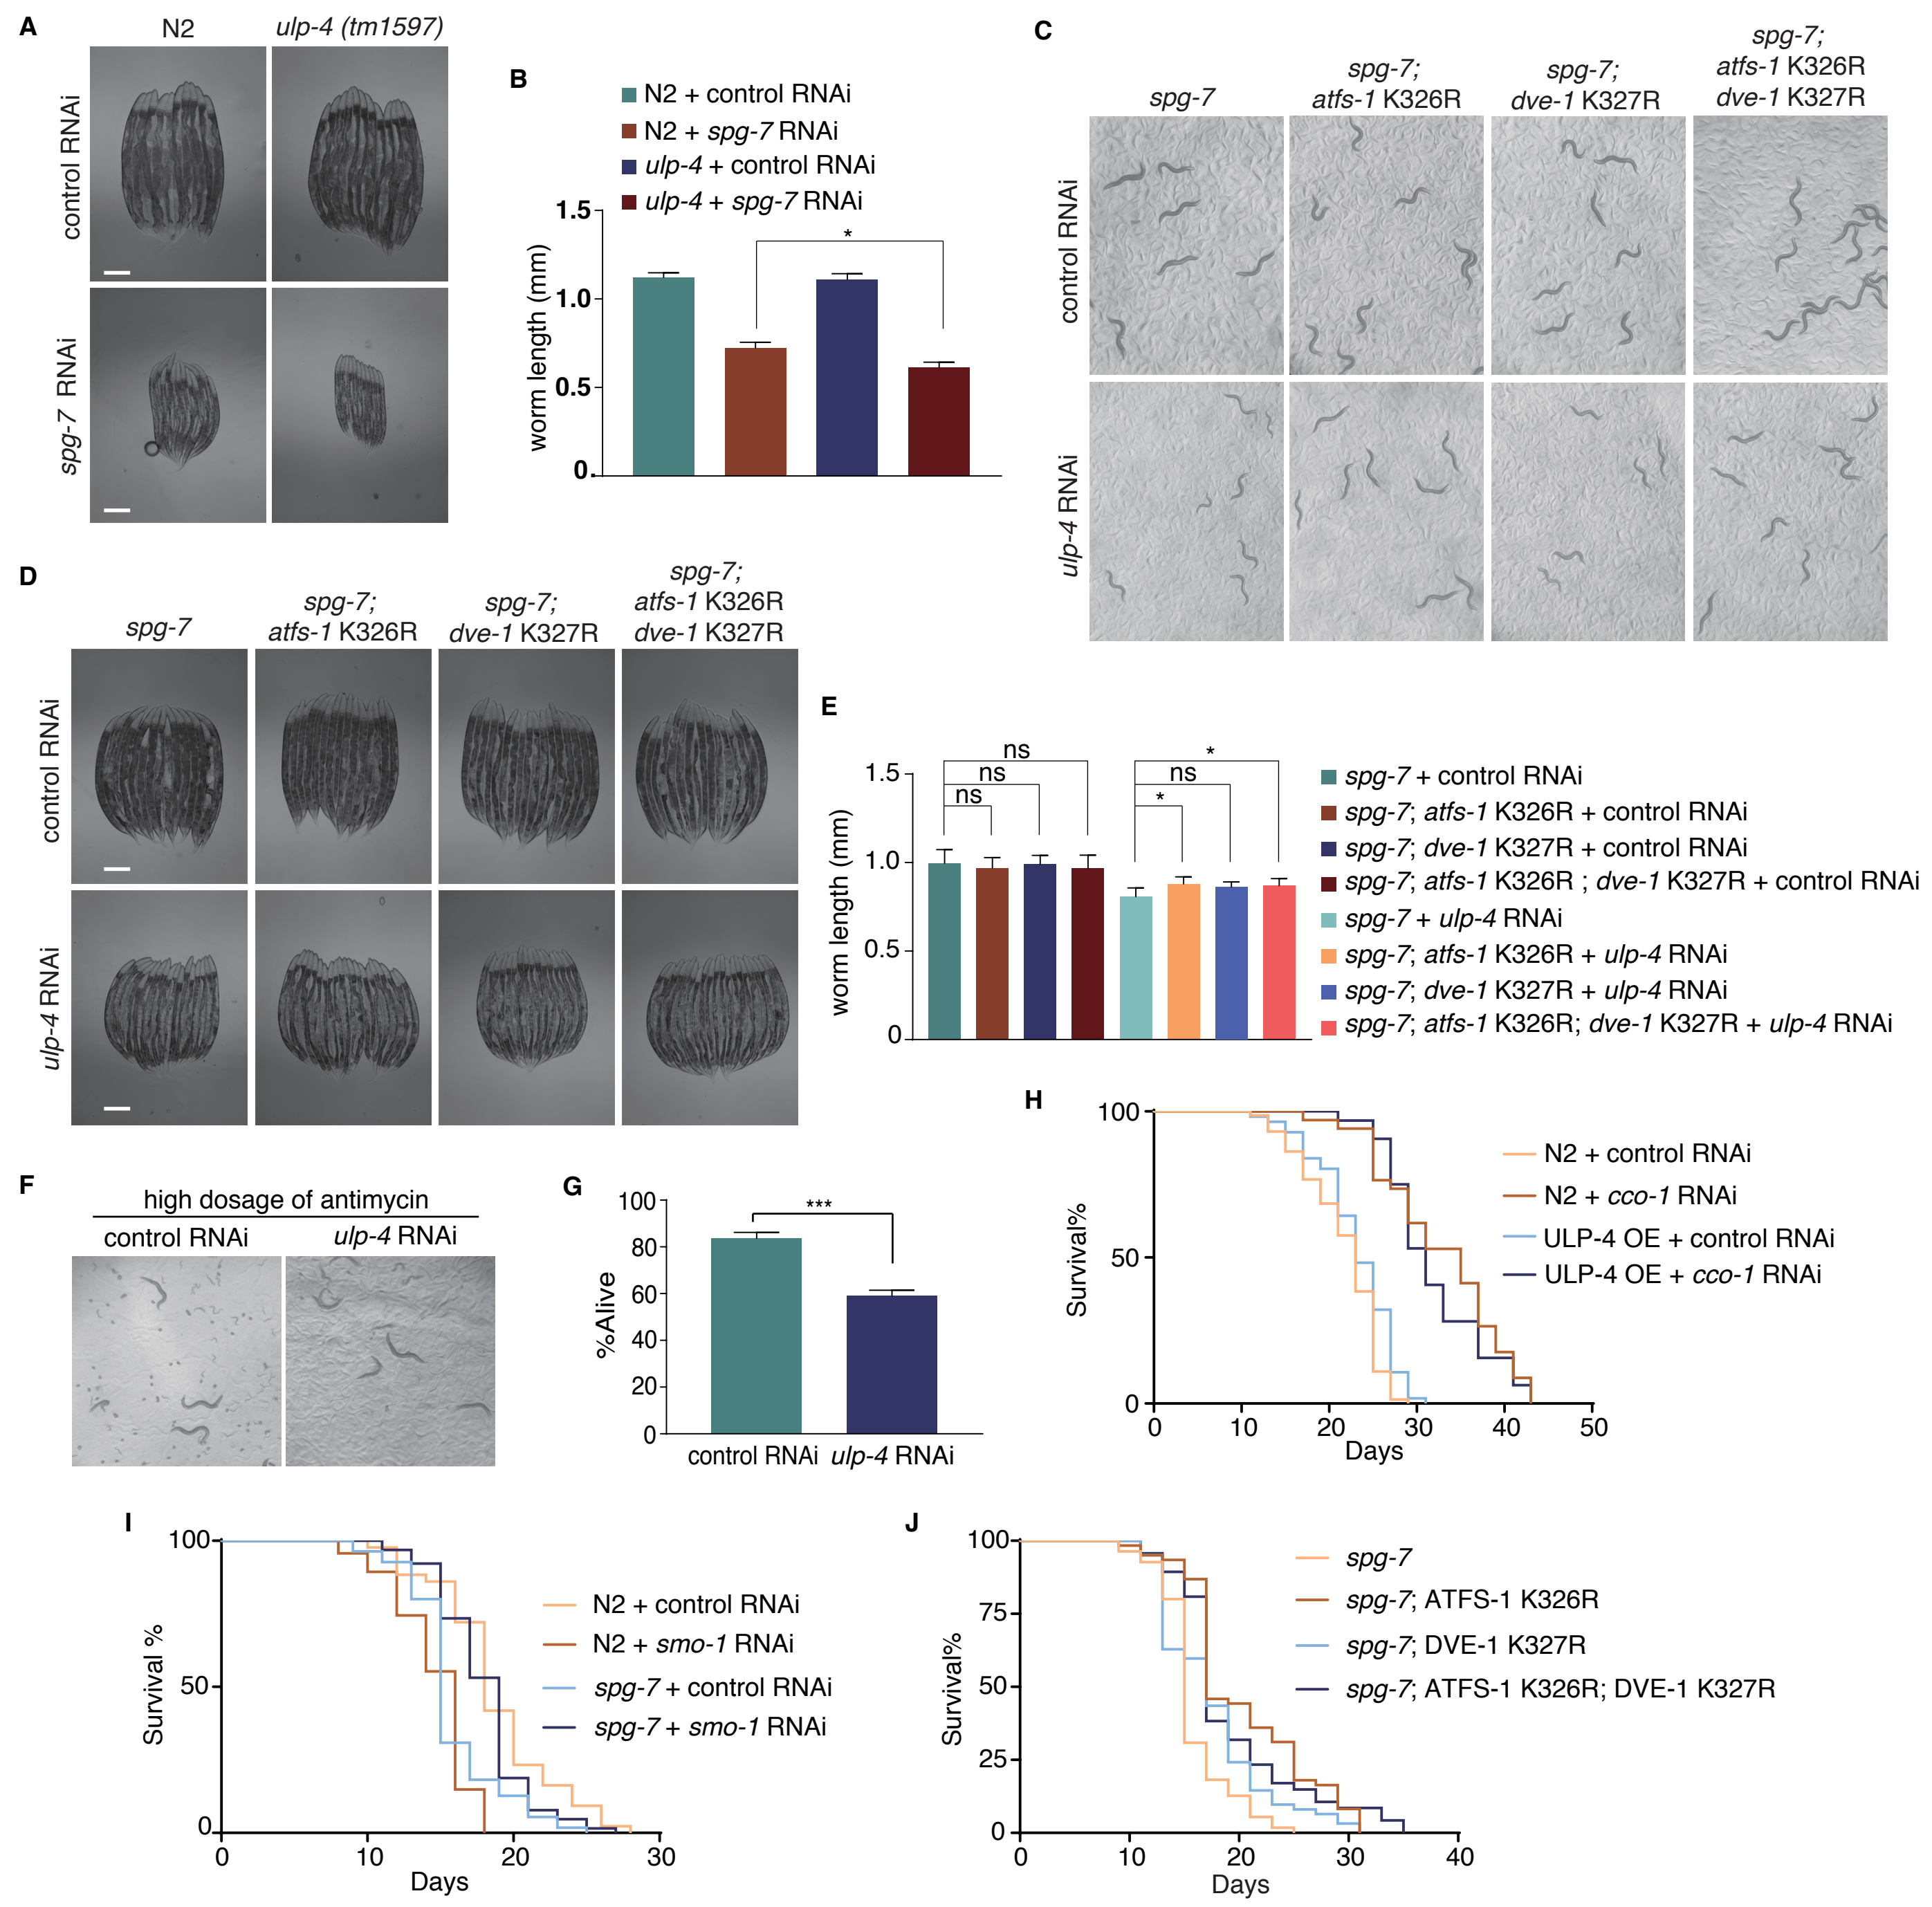

Supplement: supp [file elife_poa_e41792_Figure_6_figure_supplement_1.pdf › elife_poa_e41792_Figure_6_figure_supplement_1.pdf]
